# Supplementary material for: MicroRNA-3196 is inhibited by H2AX phosphorylation and attenuates lung cancer cell apoptosis by downregulating PUMA
Source: PubMed Central journal article supplement (PMC5363619; doi:10.18632/oncotarget.12794), 2016-10-21
Supplement: oncotarget-07-77764-s001.pdf [file oncotarget-07-77764-s001.pdf]

## MicroRNA-3196 is inhibited by H2AX phosphorylation and attenuates lung cancer cell apoptosis by downregulating PUMA

### SUPPLEMENTARY TABLE

Supplementary Table S1: Primers used in this study

| The primers for plasmid construction |                                               |
|--------------------------------------|-----------------------------------------------|
| miR-3196-F                           | ACACTCCAGCTGGG CGGGGCGGCAGG                   |
| miR-3196-R                           | CTCAACTGGTGTTCGTGGAGTCGGCAATTCAGTTGAGGAGGCCCC |
| PUMA-clone-F                         | CTAGCTAGCATGGCCCGCGCACGCCAGGAG                |
| PUMA-clone-R                         | GCTCTAGACTAATTGGGC TCCATCTCGGG                |
| PUMA-realtime-F                      | TGCTGTAGATAACCGGAATG                          |
| PUMA-realtime-R                      | TTCCACTGTTCCAATCTGAT                          |
| PUMA-UTR-F                           | TTGAGCTC CCTGCCTCACCTTCATCA                   |
| PUMA-UTR-R                           | GCTCTAGATTCCACTGTTCCAATCTGAT                  |
| PUMA-UTR-M-F                         | GGCTGAAGCCTATCCAGCCTTAG                       |
| PUMA-UTR-M-R                         | CTAAGGCTGGATAGGCTTCAGCC                       |
| miR-3196-p-F                         | GGAATTCGCTAGCACACCAACCTTGTCTCCTCTCCGA         |
| miR-3196-p-R                         | CTCGAGGTTTCTCCACACGCATCGCAGTG                 |
| miR-3196-ChIP-F                      | CAGCTTGAGAGTTCAGAGCAA                         |
| miR-3196-ChIP-R                      | CGGTTACCTTTGGTCACTTCA                         |
| U6-F                                 | CTCGCTTCGGCAGCACA                             |
| U6-R                                 | AACGCTTCACGAATTTGCGT                          |
| miRNA URP                            | TGGTGTCGTGGAGTCG                              |
